# Supplementary material for: Fabrication of Cost-Effective Glass-Bottom Cell-Culture Device using Fused Deposition Modeling: New Avenue for Bioimaging
Source: Research Square preprint supplement (doi:10.21203/rs.3.rs-8488376/v1), 2026-01-12
Supplement: Supplementary file 1 [file f5c15668231409994f3cb3d0.docx]

**Supplementary Information (SI)**

**Fabrication of Cost-Effective Glass-Bottom Cell-Culture Device using Fused Deposition Modeling: New Avenue for Bioimaging**

**Supporting Movies:**

**Movie S1:** Protein expression level for microglia cells at each Z height. The distance between each Z-stack is 0.5µm of height 20 µm and imaging was performed on 40X oil immersion objective.

**Movie S2:** Measurement of microglia activity in HMC3 cell line through 4D (XYZ-t) functional imaging with Fluo4 as calcium marker using confocal microscope in biochip.

**Movie S3:** Measurement of cellular activity in MCF-7 cell line through Ca2+ imaging using confocal microscope in biochip.

**Movie S4:** Spatial intensity mapping of Ca2+ imaging in HMC3 cell line merged into XY plan.

**Movie S5:** Comparative study between high resolution 3D imaging, High resolution 2D imaging, low resolution imaging and single focal plane imaging

**Supporting Table**

Table S1: Comparative study between FDM and SLA based 3D printer for glass coverslip and glass slide capped PDMS based biochip.

| **Parameter** | **FDM based 3D printer** | **SLA based 3D printer** |
| --- | --- | --- |
| Resolution with less than 1% error | 750 µM | 300 µM |
| Time of printing | 3 min | 3.2 hour |
| Material Used for printing | - Acrylonitrile butadiene styrene (ABS) - High Impact Polystyrene (HIPS) (Supporting material) | Resin as printing and supporting material |
| Amount of Material for printing | 1.2 gm ABS + 1 gm (HIPS) | 30 ml resin (18 ml print and 12 ml support) |
| Amount of material waste | 1 gm HIPS (0.046 USD) | 10 ml Resin (2.95 USD) |
| Post Processing Method | No post processing needed | Washing with Isopropyl alcohol and UV curing |
| Post processing Time | 0 | 4 hours |
| Template making time | 20 min | 0 hour after post processing |
| Possibility of Glass coverslip bonding of PDMS mold obtained from 3D printed template for high resolution imaging | Yes | No |
| Printer Cost (One time cost) | ~ Rs. 8 lakh (11555.6 USD) | ~Rs. 3 lakh (4333.35 USD) |
| Possibility of Glass slide bonding | Yes | Yes, but need a thin coat of PDMS on glass slide) |
| Cost of final chip  (Cost of PDMS + Cost of template + cost of post processing + Cost of glass + cost of coverslip ) | Rs. 40+ Rs. 4.76+0+ Rs. 1+ Rs. 1.5  = Rs. 47.26 (0.68 USD) | Rs. 45+ Rs. 510+ Rs. 10+ Rs.1+0  =Rs. 566 (8.18 USD) |

**Supporting Figures:**

**
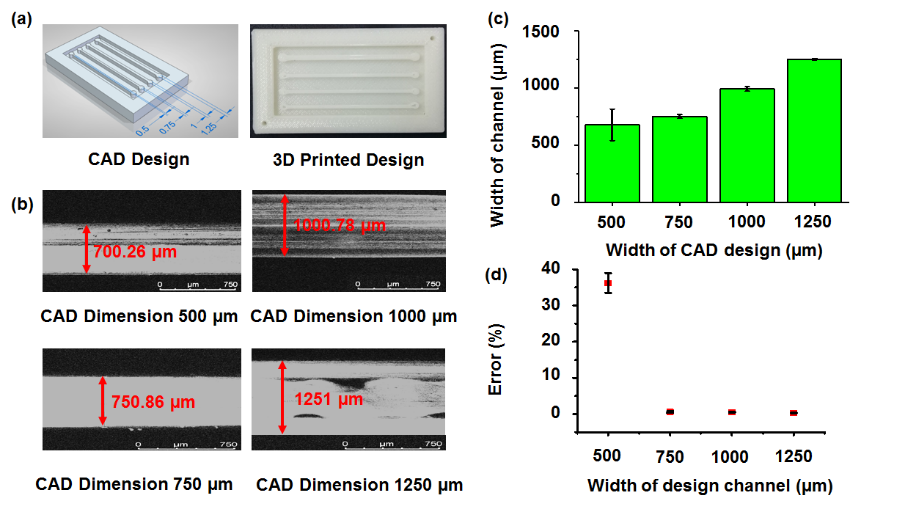
**

**Figure S1:** Evaluation of printing error in FDM based 3D printing for varying design dimensions (a) CAD model of dimension 500 µm, 750 µm, 1000 µm and 1250 µm and image showing FDM based 3D printed template with ABS as printing material (b) Microscope images of channel width using confocal microscopy (c) Comparison of design width and printed width for various dimensions (d) Printing errors for FDM printed structure. Data showed in (c) and (d) are averages along with S.E.M. (n= number of devices =10).


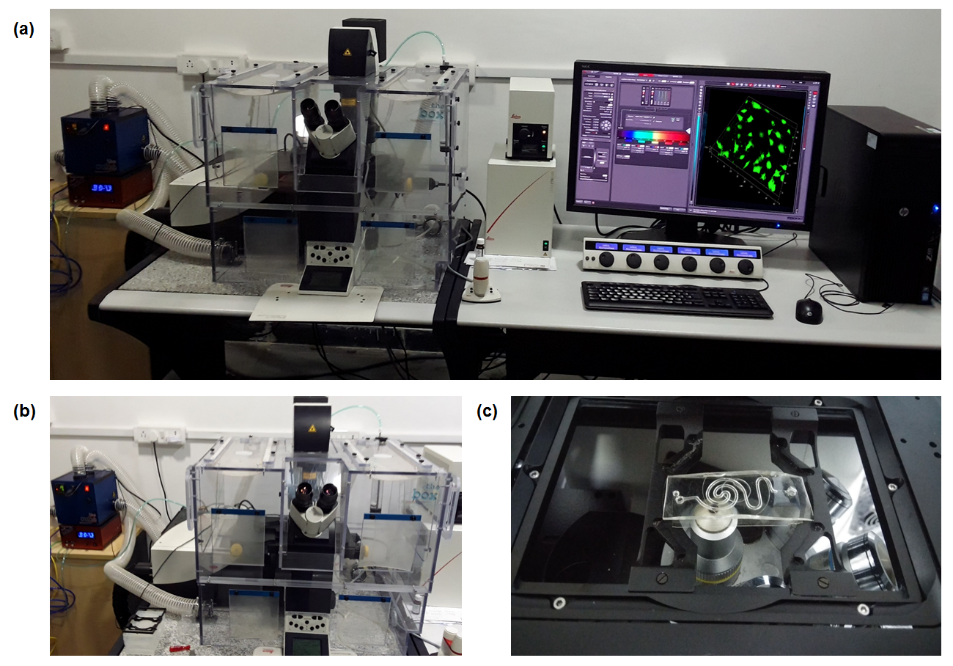


**Figure S2**: Device compatibility for the imaging under Laser scanning confocal microscope. Imaging setup contains (a) laser scanning confocal microscopy (b) the incubator with temperature, humidity and gas control (c) fabricated glass coverslip capped imaging device for live cell imaging.

**
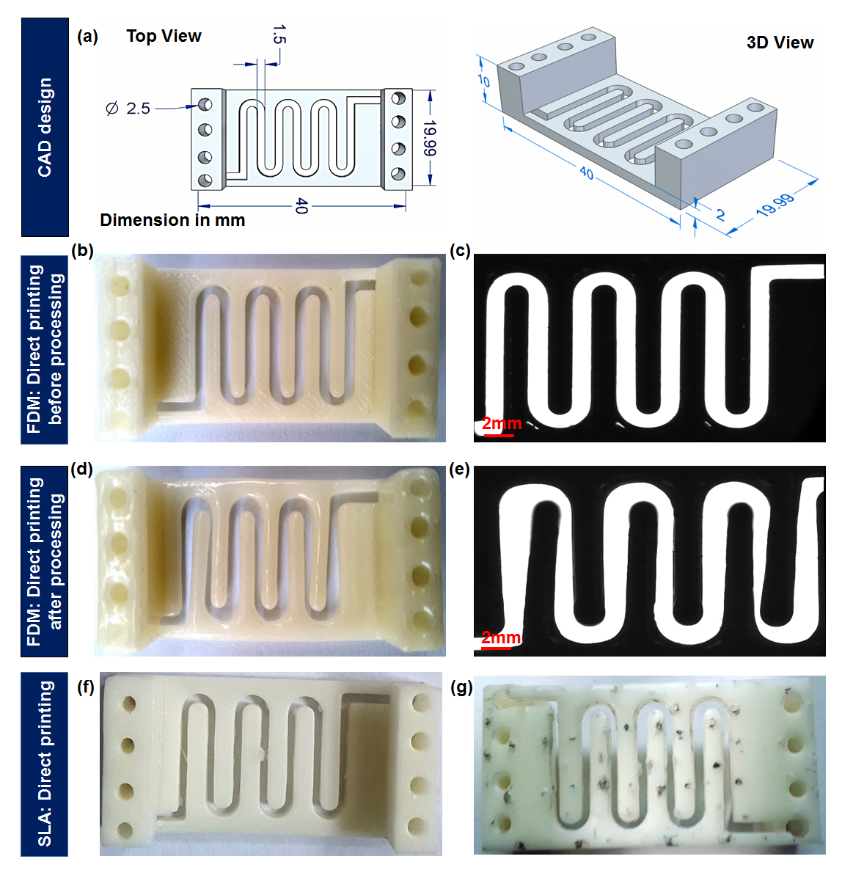
**

**Figure S3:** Comparison of direct printing using FDM (Stratasys, without post processing), FDM (Stratasys, with post processing) and SLA (Formlab). (a) Computer aided design of the chip with top view and 3D view (dimension presented in the CAD model is in mm). (b) 3D printed structure obtained from FDM, without post processing (c) Panorama image of the printed structure obtained from FDM, without post processing (d) 3D printed structure obtained from FDM, with post processing with acetone (e) Panorama image of the printed structure obtained from FDM, with post processing with acetone. (f) 3D printed structure obtained from SLA (g) Bottom part of printed structure obtained from SLA where black spots are showing the uneven area indicating that the removal of support structure is challenging.


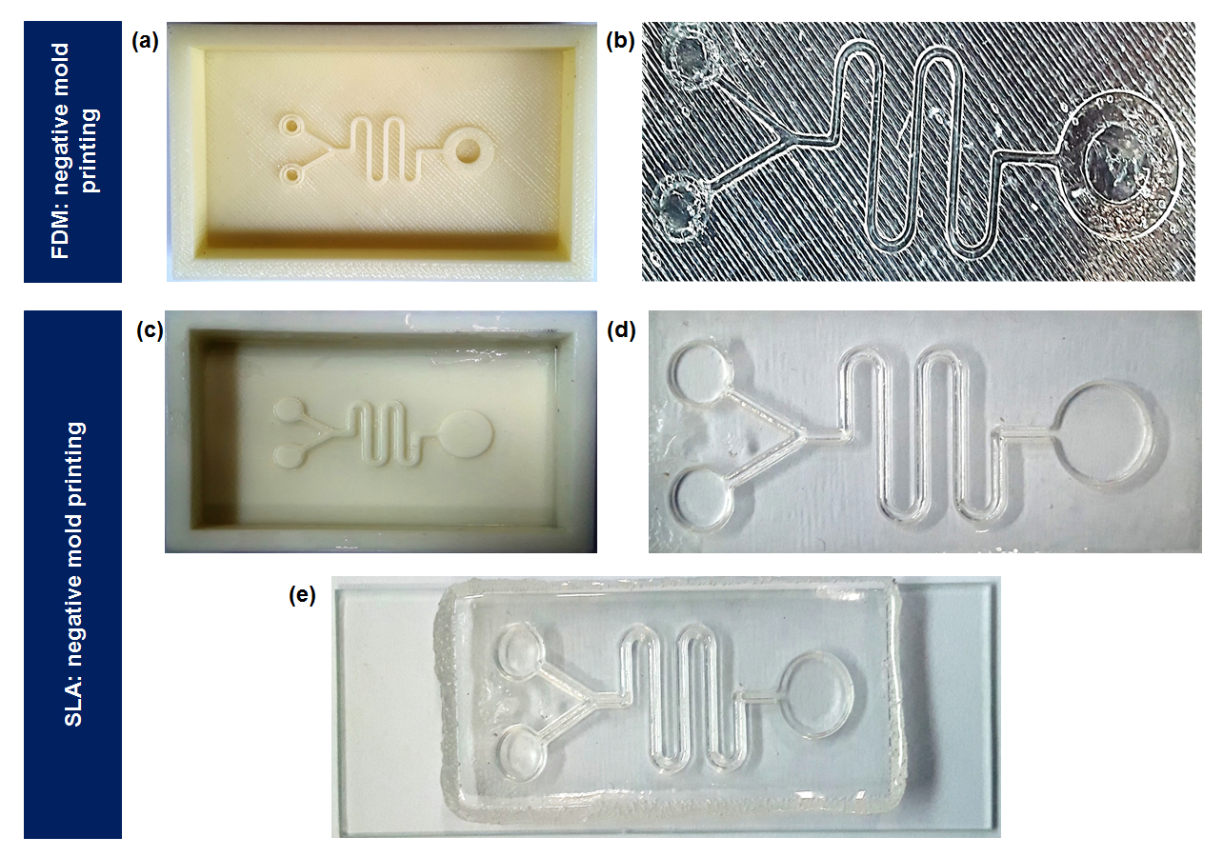


**Figure S4:** Fabrication of the device using the negative template embedded in ABS and resin rectangular box obtained from FDM and SLA printing respectively (a) 3D printed structure of the template obtained using FDM (b) PDMS replica obtained from FDM based printing (c) 3D printed structure of the template obtained using SLA with post processing using isopropyl alcohol (d) PDMS replica obtained from SLA based printing (e) PDMS replica adhered to glass slide using PDMS thin coating on the slide.


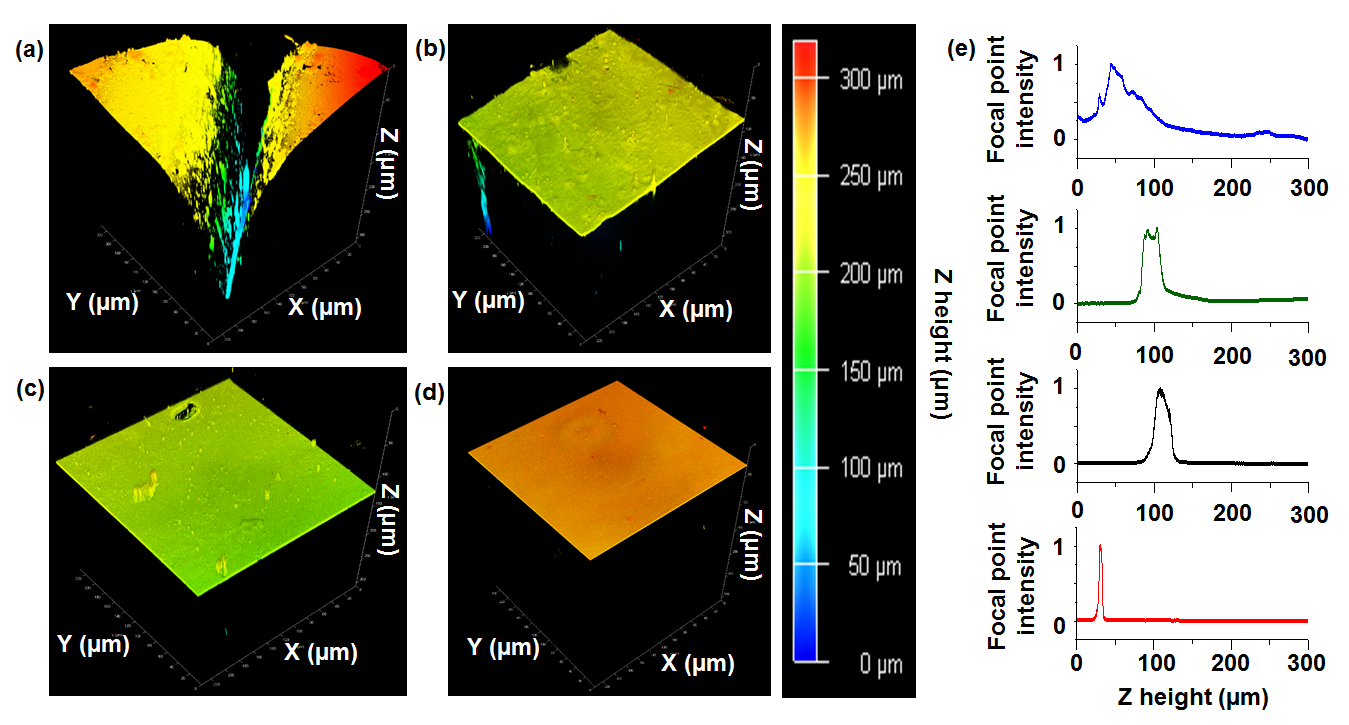


**Figure S5:** Comparison of surface roughness of PDMS structure obtained from the negative templates using various fabrication schemes (a) ABS template using FDM without any post processing (b) ABS template using FDM with post processing using acetone (c) resin template using CLIP (d) ABS template adhered to the glass slide fabricated by the proposed method (e) The focal point intensity as function of Z height for (a), (b),(c) and (d) [Total height = 300 µm]


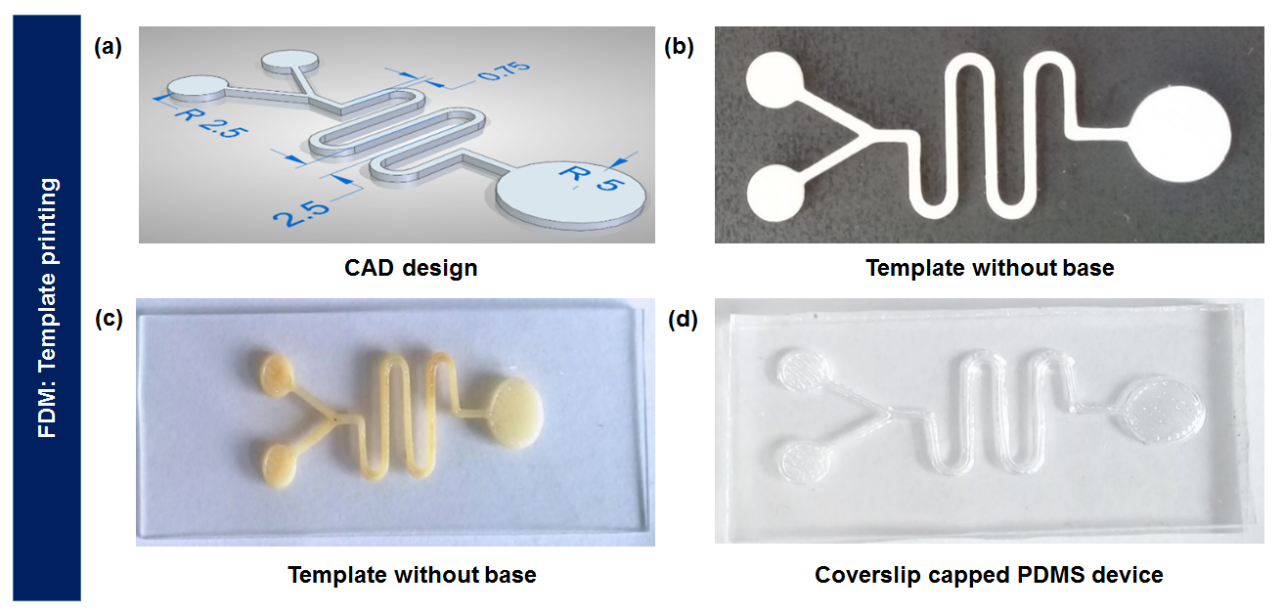


**Figure S6:** Fabrication of channel with different design using negative 3D printed template (a) CAD design of the channel (b) 3D printed structure (c) 3D printed channel embedded to glass slide (negative mold)


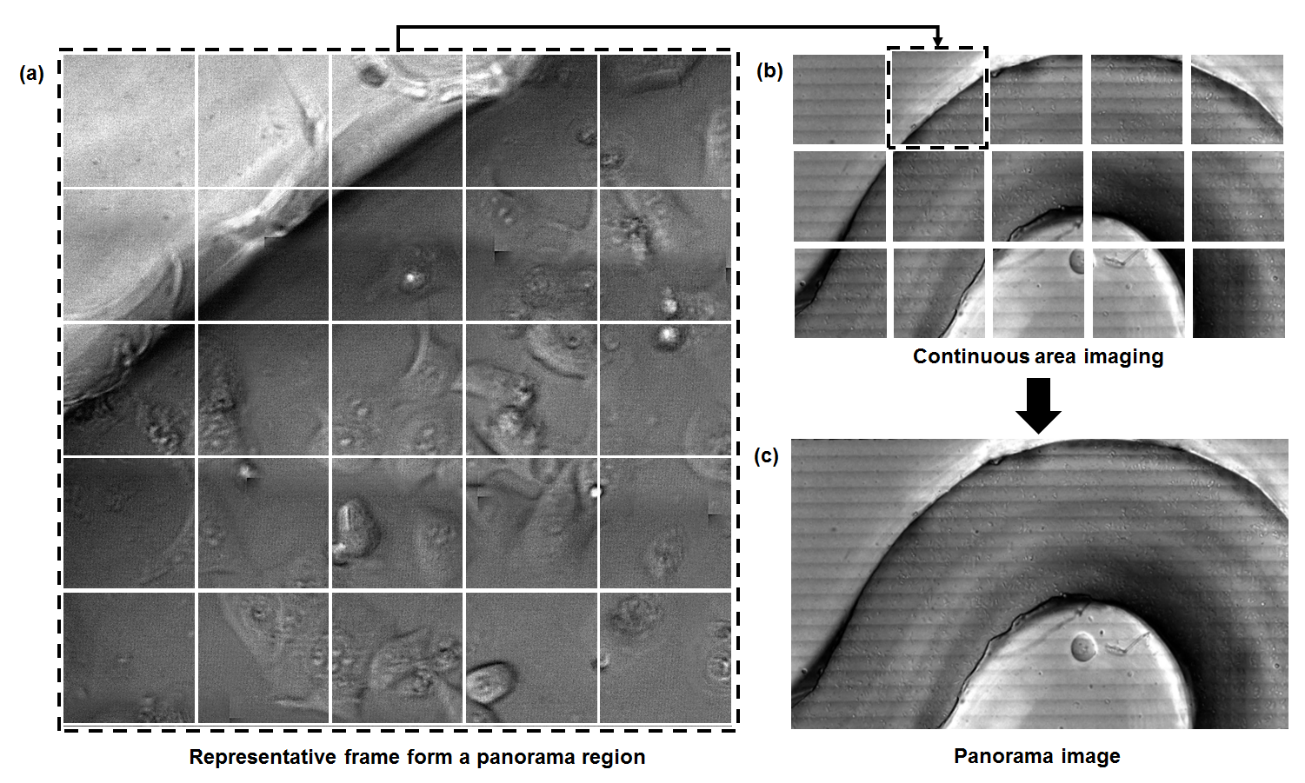


**Figure S7:** Panorama construction of the MCF-7 cells grown within the chip though stitching of a large array of image after 36 hour of incubation (a) representative images from 5×5 section using 40X objective (b) Image of a section A constructed from 5×3 individual image (c) Panorama image of small section in chip constructed from (((5 × 5) × 5 )× 3) images (Stitching of 375 individual images)


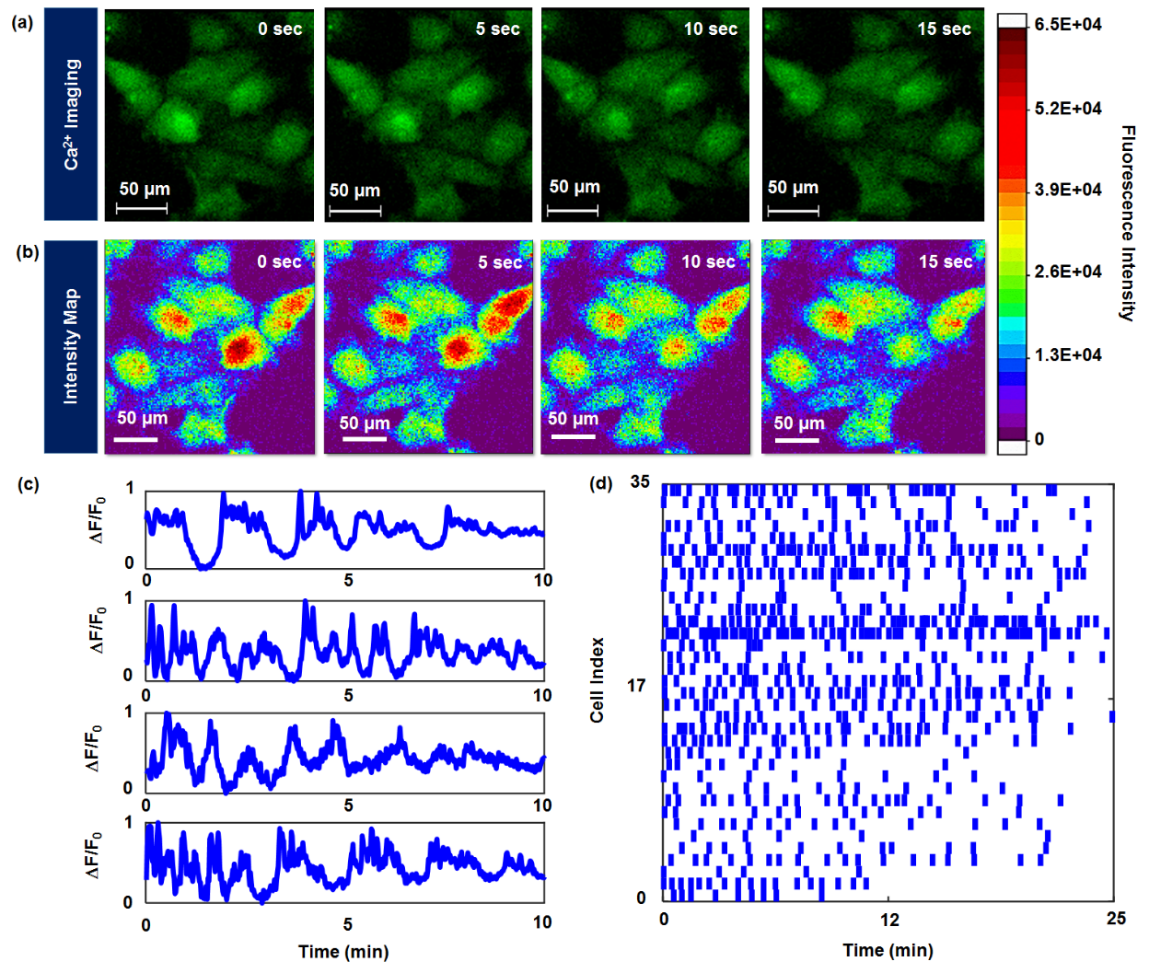


**Figure S8:** Time-lapse calcium imaging of MCF-7 cells within 3D printed biochip (a) Representative images of the MCF-7 population at various time points showing Ca2+ response (total time of imaging =25 min) (b) spatial intensity mapping of the MCF-7 population at various time points (c) representative basic plots for time course of cytosolic Ca2+ level in single cells (d) raster plots representing the cellular activity of MCF-7 cell population.


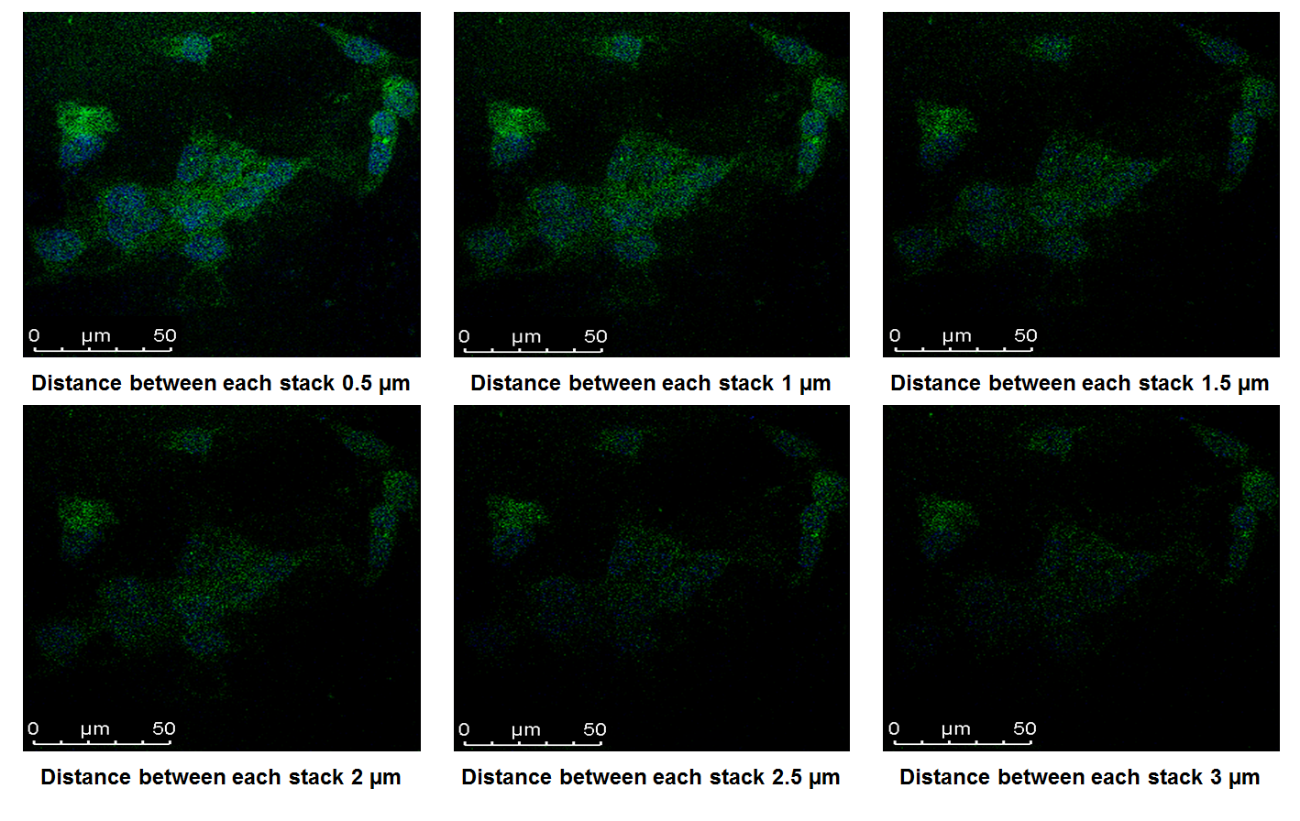


**Figure S9:** Comparison of 3D imaging obtained at various resolution levels using LSCM under resonance scanner. The resolution was varied through change in Z distance between each stack. 2D images were obtained by merging the confocal z-stacks for each focal plane.

**
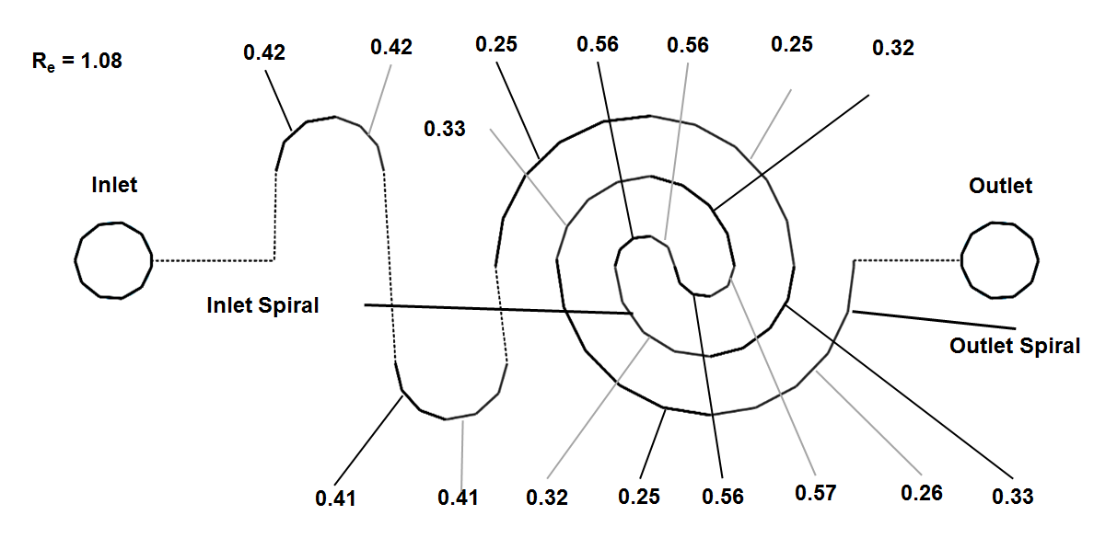
**

**Figure S10:** Dean Number along the spiral area at constant Re of 1.08.
